# Supplementary material for: Accurate vibrational hydrogen-bond shift predictions with multicomponent DFT
Source: Royal Society of Chemistry journal article supplement (doi:10.1039/d5sc02165k), 2025-01-01
Supplement: d5sc02165k1.pdf [file d5sc02165k1.pdf]

Table S1 Shifts (in  $\text{cm}^{-1}$ ) of the vibrational wavenumber associated with the symmetric stretching for each functional included in the study, and the deperturbed experimental value.

| Set         | Mol.             | Exp. | B3LYP-D3BJ | PBE0-D3BJ | B2PLYP-D3BJ | DSD-PBEP86-D3BJ |
|-------------|------------------|------|------------|-----------|-------------|-----------------|
|             | H <sub>2</sub> O | 0    | 0.0        | 0.0       | 0.0         | 0.0             |
| TRAINING    | ACE              | 126  | 174.1      | 195.8     | 160.4       | 155.1           |
|             | APH              | 127  | 176.7      | 195.5     | 161.9       | 154.4           |
|             | TFB              | 10   | 5.9        | 8.6       | 8.3         | 8.8             |
|             | POH              | 37   | 40.9       | 52.3      | 42.4        | 48.5            |
|             | IMZ              | 199  | 250.3      | 271.7     | 225.3       | 214.5           |
|             | ANL              | 133  | 160.6      | 179.9     | 148.7       | 139.6           |
|             | DBF              | 34   | 45.6       | 48.4      | 44.6        | 43.0            |
|             | OCF              | 62   | 103.5      | 123.2     | 91.0        | 85.0            |
|             | CBU              | 109  | 151.6      | 170.5     | 139.3       | 135.3           |
| TEST        | CON              | 154  | 206.1      | 228.7     | 189.9       | 183.4           |
|             | DMI              | 165  | 207.3      | 225.8     | 190.6       | 183.6           |
|             | FAH              | 66   | 103.9      | 119.5     | 97.6        | 95.0            |
|             | MLA              | 133  | 188.2      | 218.2     | 170.9       | 164.9           |
|             | PCD              | 60   | 56.6       | 77.3      | 59.9        | 66.2            |
|             | PYR              | 203  | 265.1      | 285.4     | 237.7       | 225.5           |
|             | THF              | 166  | 212.4      | 226.6     | 204.7       | 199.8           |
|             | THT              | 150  | 205.4      | 229.8     | 180.3       | 173.9           |
|             | TPH              | 46   | 80.4       | 90.3      | 71.1        | 65.9            |
|             | TFE              | 8    | 9.8        | 13.3      | 11.7        | 12.1            |
| EXTENSION I | ACD              | 125  | 174.2      | 195.9     | 160.5       | 155.1           |
|             | CHP              | 141  | 193.7      | 215.7     | 179.4       | 173.8           |
|             | CHX              | 134  | 184.1      | 204.9     | 169.9       | 163.5           |
|             | GMC              | 137  | 187.3      | 208.6     | 171.3       | 164.5           |
|             | FEN              | 139  | 194.8      | 215.0     | 178.8       | 172.5           |
|             | OFA              | 112  | 161.8      | 180.4     | 148.0       | 141.2           |
|             | PFA              | 117  | 172.8      | 192.3     | 158.0       | 150.6           |
|             | OFB              | 81   | 135.4      | 147.7     | 119.2       | 110.5           |
|             | PFB              | 87   | 143.7      | 157.6     | 127.0       | 118.2           |
|             | MGL              | 115  | 174.5      | 201.9     | 155.8       | 148.9           |
|             | PIN              | 132  | 181.6      | 203.0     | 167.1       | 161.0           |
|             | TBA              | 127  | 180.1      | 197.5     | 167.9       | 163.9           |
|             | AMC              | 110  | 160.0      | 179.3     | 145.2       | 138.6           |
|             | BMC              | 143  | 195.8      | 216.5     | 181.4       | 174.3           |

Table S2 RMSDs on the HyDRA database (separated by sets) in  $\text{cm}^{-1}$  for each functional included in the study.

|                 | B3LYP-D3BJ | PBE0-D3BJ | B2PLYP-D3BJ | DSD-PBEP86-D3BJ |
|-----------------|------------|-----------|-------------|-----------------|
| TRAINING        | 36.3       | 52.7      | 24.2        | 19.2            |
| TEST            | 43.9       | 62.1      | 29.4        | 24.0            |
| EXTENSION I     | 52.9       | 72.7      | 37.9        | 31.3            |
| TRAINING + TEST | 40.5       | 57.8      | 27.0        | 21.8            |
| ALL             | 46.2       | 64.6      | 32.1        | 26.3            |

Table S3 Comparison of  $R^2$  values, the RMSDs of the linear fits and the RMSDs on the HyDRA test set obtained with the fit of training set in  $\text{cm}^{-1}$  for the each individual functional obtained with the def2-QZVPP electronic basis set and PB6-F nuclear basis set.

|                               | B3LYP-D3BJ | PBE0-D3BJ | B2PLYP-D3BJ | DSD-PBEP86-D3BJ |
|-------------------------------|------------|-----------|-------------|-----------------|
| $R^2$                         |            |           |             |                 |
| Training set                  | 0.92       | 0.93      | 0.82        | 0.64            |
| Test set                      | 0.64       | 0.77      | 0.75        | 0.64            |
| All                           | 0.77       | 0.85      | 0.79        | 0.64            |
| Fit RMSD / $\text{cm}^{-1}$   |            |           |             |                 |
| Training set                  | 5.5        | 7.1       | 6.3         | 6.8             |
| Test set                      | 12.3       | 13.0      | 7.3         | 6.6             |
| All                           | 9.6        | 10.7      | 7.0         | 6.8             |
| HyDRA RMSD / $\text{cm}^{-1}$ |            |           |             |                 |
| Test set                      | 12.6       | 13.5      | 7.6         | 6.7             |

Table S4 Overview of the individual errors on the test set in  $\text{cm}^{-1}$  obtained by employing Model-9.

| Test system | B3LYP-D3BJ | PBE0-D3BJ | B2PLYP-D3BJ | DSD-PBEP86-D3BJ |
|-------------|------------|-----------|-------------|-----------------|
| CON         | -3.18      | -2.83     | -1.16       | 0.21            |
| DMI         | 11.12      | 15.83     | 9.9         | 10.36           |
| FAH         | -6.2       | -9.87     | -10.93      | -11.83          |
| MLA         | 3.63       | -2.02     | 2.02        | 1.28            |
| PCD         | 25.09      | 18.46     | 6.8         | 2.31            |
| PYR         | -9.42      | -4.49     | 0.98        | 6.01            |
| TFE         | 13.85      | 14.36     | 3.19        | -0.84           |
| THF         | -4.01      | 2.89      | -13.13      | -10.0           |
| THT         | -17.75     | -23.3     | -1.06       | 3.34            |
| TPH         | -4.01      | -1.54     | -3.48       | -2.8            |

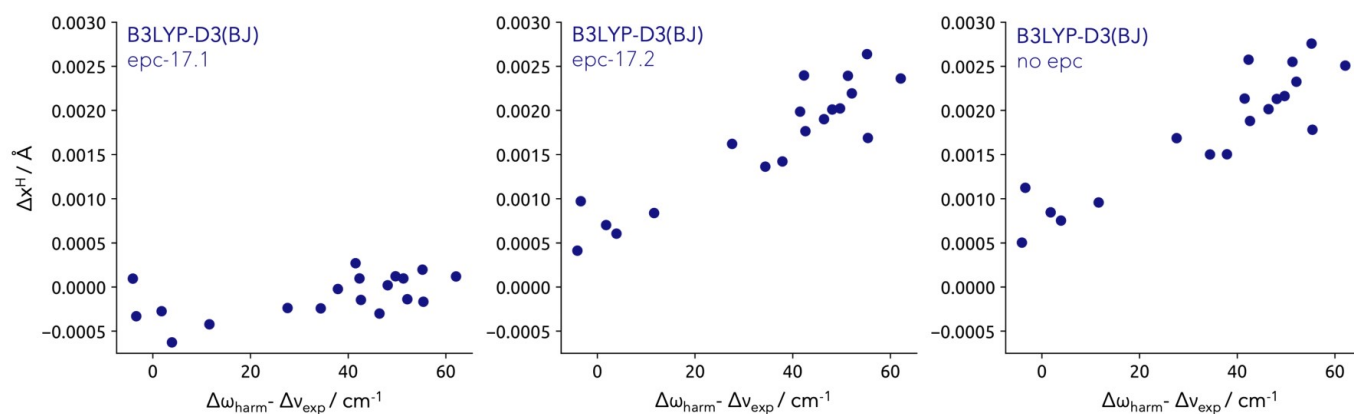

Figure S1 Comparison of the obtained data distribution for the training and test set computed with different electron-proton correlation functionals (epc-17.1 on the left and epc-17.2 in the middle) together with results employing no epc functional (on the right), all utilizing the electronic B3LYP-D3(BJ) functional.

Table S5 Comparison of  $R^2$  values, the RMSDs of the linear fits and the RMSDs on the HyDRA test set obtained with the fit of training set (Model-9) in  $\text{cm}^{-1}$  for the constrained and unconstrained intercept for each individual functional.

|                               | B3LYP-D3BJ | PBE0-D3BJ | B2PLYP-D3BJ | DSD-PBEP86-D3BJ |
|-------------------------------|------------|-----------|-------------|-----------------|
| Unconstrained fit             |            |           |             |                 |
| $R^2$                         |            |           |             |                 |
| Training set                  | 0.97       | 0.97      | 0.86        | 0.65            |
| Test set                      | 0.72       | 0.79      | 0.73        | 0.60            |
| All                           | 0.84       | 0.89      | 0.80        | 0.64            |
| Fit RMSD / $\text{cm}^{-1}$   |            |           |             |                 |
| Training set                  | 3.8        | 4.5       | 5.1         | 7.3             |
| Test set                      | 13.1       | 13.2      | 8.0         | 7.9             |
| All                           | 9.3        | 9.7       | 6.7         | 7.7             |
| HyDRA RMSD / $\text{cm}^{-1}$ |            |           |             |                 |
| Test set                      | 12.1       | 13.3      | 7.7         | 8.8             |
| Constrained fit               |            |           |             |                 |
| $R^2$                         |            |           |             |                 |
| Training set                  | 0.78       | 0.87      | 0.83        | 0.57            |
| Test set                      | 0.31       | 0.65      | 0.66        | 0.55            |
| All                           | 0.56       | 0.77      | 0.75        | 0.57            |
| Fit RMSD / $\text{cm}^{-1}$   |            |           |             |                 |
| Training set                  | 7.0        | 7.6       | 4.8         | 6.2             |
| Test set                      | 12.5       | 12.4      | 7.0         | 6.6             |
| All                           | 10.3       | 10.4      | 6.1         | 6.5             |
| HyDRA RMSD / $\text{cm}^{-1}$ |            |           |             |                 |
| Test set                      | 12.7       | 12.8      | 7.2         | 6.8             |

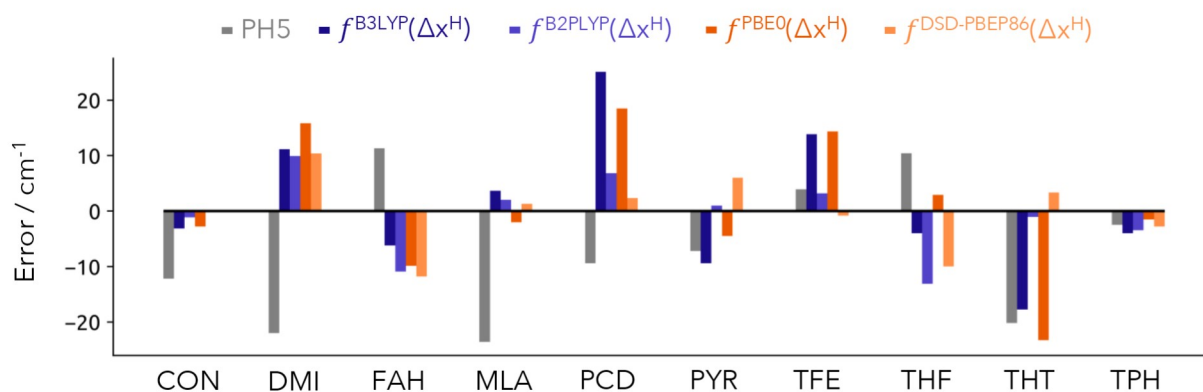

Figure S2 Error in the predictions using Model-9 for the test set molecular systems included in the HyDRA database in comparison with the original PH5 submission. Errors provided in  $\text{cm}^{-1}$ .

Table S6 Overview of the individual errors on the extension set I in  $\text{cm}^{-1}$  obtained by employing Model-19.

| Extra system | B3LYP-D3BJ | PBE0-D3BJ | B2PLYP-D3BJ | DSD-PBEP86-D3BJ |
|--------------|------------|-----------|-------------|-----------------|
| ACD          | 8.45       | 11.73     | 4.33        | 2.1             |
| CHP          | -2.65      | -4.31     | -2.82       | -3.15           |
| CHX          | -1.25      | -2.09     | -1.77       | -0.52           |
| GMC          | -1.42      | -2.57     | -0.45       | 1.79            |
| FEN          | -13.84     | -17.71    | -10.96      | -9.3            |
| OFA          | -7.83      | -12.09    | -8.24       | -6.06           |
| PFA          | -8.7       | -14.48    | -9.89       | -8.83           |
| OFB          | -10.63     | -7.45     | -7.06       | -5.17           |
| PFB          | -11.54     | -8.82     | -7.69       | -5.85           |
| MGL          | -12.04     | -19.83    | -7.79       | -5.78           |
| PIN          | -4.8       | -6.83     | -6.29       | -4.25           |
| TBA          | -10.23     | -9.14     | -10.48      | -10.78          |
| AMC          | 0.69       | 1.6       | 0.24        | 0.68            |
| BMC          | -5.41      | -6.92     | -5.56       | -4.32           |

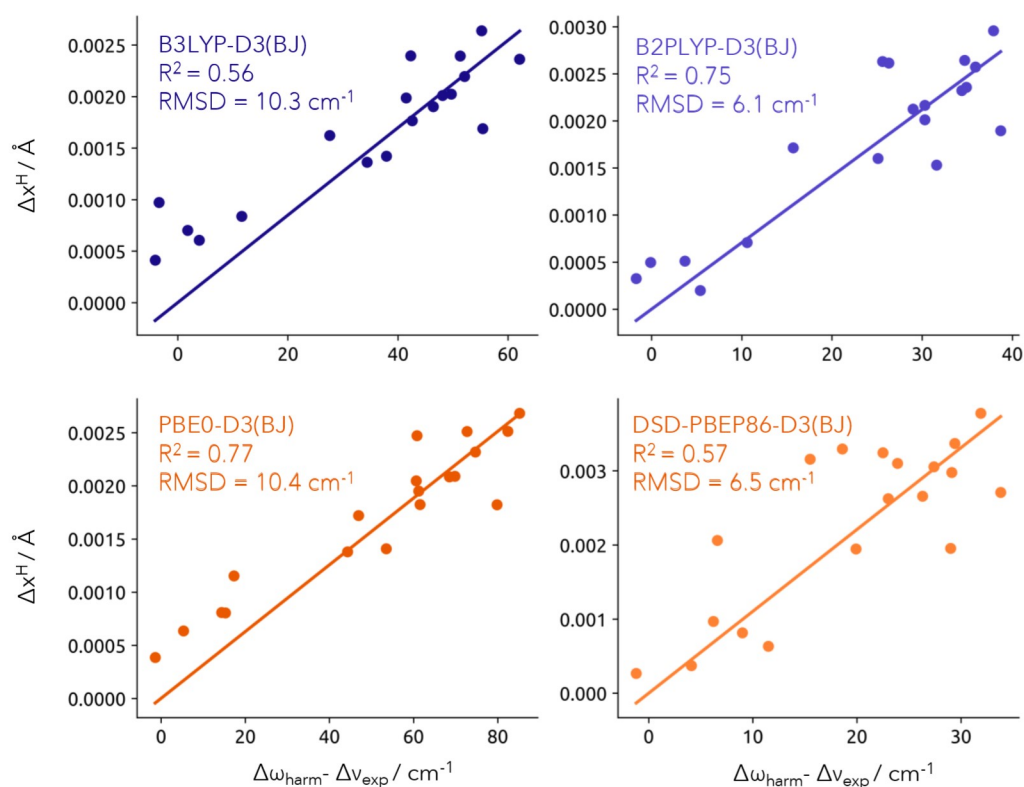

Figure S3 Linear fit for the training and test sets (Model-19) constrained to cross the [0, 0] at the different levels of theory. RMSD provided in  $\text{cm}^{-1}$ .

Table S7 Obtained fitting parameters of the linear regression performed on the training set and combined test and training sets as  $\Delta x^H = a \cdot (\Delta \omega_{\text{harm}} - \Delta V_{\text{exp}}) + b$  (Model-9 and Model-19, respectively) with and without the intercept constrained to the origin.

|            | fixed intercept [0, 0]       | unconstrained                |                  |
|------------|------------------------------|------------------------------|------------------|
|            | a / $10^{-5} \text{ \AA cm}$ | a / $10^{-5} \text{ \AA cm}$ | b / $\text{\AA}$ |
| Model-9    |                              |                              |                  |
| B3LYP      | 4.484                        | 3.284                        | 0.0005           |
| PBE0       | 3.226                        | 2.526                        | 0.0003           |
| B2PLYP     | 7.409                        | 6.445                        | 0.0004           |
| DSD-PBEP86 | 11.378                       | 8.687                        | 0.0006           |
| Model-19   |                              |                              |                  |
| B3LYP      | 4.242                        | 2.836                        | 0.018            |
| PBE0       | 3.141                        | 2.372                        | 0.017            |
| B2PLYP     | 7.068                        | 5.856                        | 0.019            |
| DSD-PBEP86 | 11.037                       | 8.59                         | 0.017            |
